# Supplementary material for: An assembled-nanosheets discus-like Ni(OH)2 hierarchical structure as a high performance electrode material for supercapacitors
Source: Royal Society of Chemistry journal article supplement (doi:10.1039/c5ra10476a), 2015-01-01
Supplement: c5ra10476a1.pdf [file c5ra10476a1.pdf]

## Supporting Information

# **Nanosheets-assembled discus-like Ni(OH)<sub>2</sub> hierarchical structure as high performance electrode materials for supercapacitor**

Mengqi Shen,<sup>a</sup> Lianbo Ma,<sup>b</sup> Jun Zhu,<sup>b</sup> Xiang Li<sup>a</sup> and Ce Wang<sup>a</sup>

<sup>a</sup> *College of Chemistry, Jilin University, Changchun, 130012, P. R. China*

<sup>b</sup> *School of Chemistry and Chemical Engineering, Jiangsu University, Zhenjiang 212013, P. R. China*

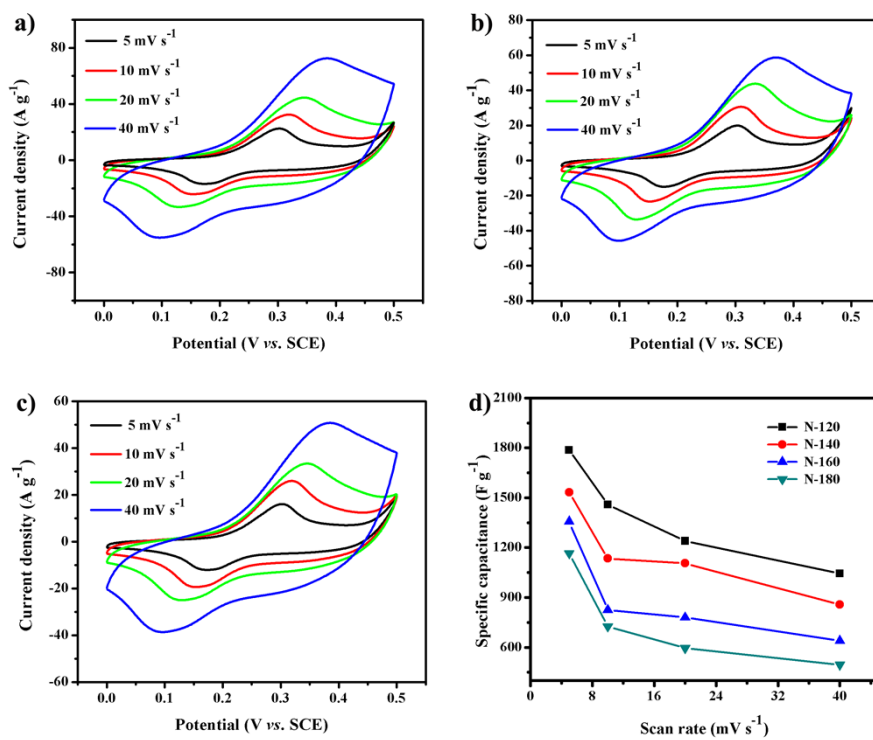

**Fig. S1.** The CV curves of (a) N-140, (b) N-160 and (c) N-180 products. (d) The specific capacitance values of N-120, N-140, N-160 and N-180 samples calculated based on the CV curves as a function of the scan rate.

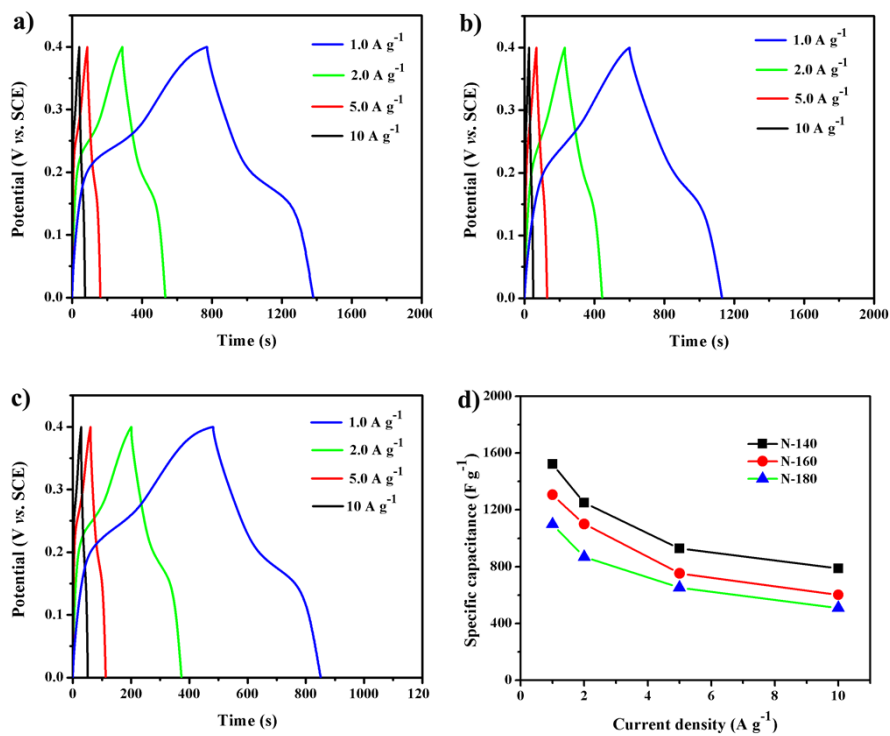

**Fig. S2.** The charge-discharge curves of (a) N-140, (b) N-160 and (c) N-180 products. (d) The specific capacitance values of N-140, N-160 and N-180 products as a function of current density.
